# Supplementary material for: Modeling binary and graded cone cell fate patterning in the mouse retina
Source: PubMed Central journal article supplement (PMC7082072; doi:10.1371/journal.pcbi.1007691), 2020-03-09
Supplement: pcbi.1007691.s002.pdf [file pcbi.1007691.s002.pdf]

**Table S1:** Retina image names and genotypes.

| Retina | Filename                                              | Genotype               | Num. Cells |
|--------|-------------------------------------------------------|------------------------|------------|
| R07    | 170505_2M_WT_F1_Left_20x_Stitch_MIP                   | WT                     | 65467      |
| R08    | 170505_2M_WT_F1_Right_20x-Stitch-MIP                  | WT                     | 50437      |
| R09    | 170505_2M_WT_F2_Left_20x-Stitch-MIP                   | WT                     | 34381      |
| R22    | 170817_pregnantMALE_CONTROL_BL6_1_20x-Stitch-MIP_c1+2 | WT                     | 40660      |
| R25    | 171026_WT_F1_Left_20x-Stitch-MIP                      | WT                     | 29831      |
| R26    | 171026_WT_F1_Right_20x-Stitch-MIP                     | WT                     | 29962      |
| R31    | 180123_ThrB2_KO_4M_DV_Right_slide1_20x_Stitch-MIP     | $\Delta$ THR $\beta$ 2 | 10781      |
| R32    | 180123_ThrB2_KO_4M_DV_Right_slide2_20x-Stitch-MIP     | $\Delta$ THR $\beta$ 2 | 10508      |
| R33    | 180123_ThrB2_KO_4M_whole_Right_slide1_20X-Stitch-MIP  | $\Delta$ THR $\beta$ 2 | 15570      |
