# Supplementary material for: Modeling binary and graded cone cell fate patterning in the mouse retina
Source: PubMed Central journal article supplement (PMC7082072; doi:10.1371/journal.pcbi.1007691), 2020-03-09
Supplement: pcbi.1007691.s003.pdf [file pcbi.1007691.s003.pdf]

**Table S2:** The number of cells identified per subtype by hand (H) and computer (C) annotation.

| Retina Section Filename                        | S- & M-opsin (H/C) | S-only (H/C) | M-only (H/C) |
|------------------------------------------------|--------------------|--------------|--------------|
| 171026_WT_F1_Left_20x-Stitch-MIP-DORSAL        | 13/23              | 4/6          | 584/753      |
| 171026_WT_F2p_Left_780_20x-Stitch-MIP-VENTRAL  | 267/313            | 82/70        | 2/1          |
| 171026_WT_F2p_Left_780_20x-Stitch-MIP-CENTER   | 186/277            | 20/26        | 0/1          |
| 171026_WT_F2p_Left_780_20x-Stitch-MIP-DORSAL   | 4/5                | 10/13        | 427/377      |
| 171026_WT_F2p_Right_800_20x-Stitch-MIP-VENTRAL | 380/783            | 198/303      | 0/0          |
| 171026_WT_F2p_Right_800_20x-Stitch-MIP-CENTER  | 515/1060           | 64/81        | 8/1          |
| 171026_WT_F2p_Right_800_20x-Stitch-MIP-DORSAL  | 17/29              | 3/4          | 259/264      |
