# Supplementary material for: Modeling binary and graded cone cell fate patterning in the mouse retina
Source: PubMed Central journal article supplement (PMC7082072; doi:10.1371/journal.pcbi.1007691), 2020-03-09
Supplement: pcbi.1007691.s004.pdf [file pcbi.1007691.s004.pdf]

**Table S3:** Parameters used in the microenvironment model.

| Name                                  | Value                                              | Fit | Description                                          |
|---------------------------------------|----------------------------------------------------|-----|------------------------------------------------------|
| <i>Simulation Setup</i>               |                                                    |     |                                                      |
| <i>strip_width</i>                    | $1000 \times 10^{-6}$ m                            |     | Retinal strip width                                  |
| <i>strip_height</i>                   | $5000 \times 10^{-6}$ m                            |     | Retinal strip height                                 |
| <i>dx</i>                             | $5 \times 10^{-6}$ m                               |     | PDE lattice spacing                                  |
| <i>dt</i>                             | $8.33 \times 10^{-2}$ s                            |     | PDE time step                                        |
| <i>d<sub>cell-cell</sub></i>          | $15 \times 10^{-6}$ m                              |     | Center-to-center spacing between cells               |
| <i>r<sub>cell</sub></i>               | $5 \times 10^{-6}$ m                               |     | Cell radius                                          |
| <i>t<sub>sync</sub></i>               | $1.0 \times 10^0$ s                                |     | Synchronization time between PDE and CME simulations |
| <i>PDE Model</i>                      |                                                    |     |                                                      |
| <i>D</i>                              | $1 \times 10^{-10}$ m <sup>2</sup> s <sup>-1</sup> |     | T3 diffusion coefficient                             |
| <i>C<sub>hi</sub></i>                 | $1 \times 10^{-7}$ M                               |     | T3 dorsal concentration                              |
| <i>C<sub>lo</sub></i>                 | $1 \times 10^{-9}$ M                               |     | T3 ventral concentration                             |
| <i>CME Model - THRβ2 activity</i>     |                                                    |     |                                                      |
| <i>μ<sub>thrb</sub></i>               | $1 \times 10^{-8}$ M                               |     | Mean of the cellular THRβ2 concentration             |
| <i>σ<sub>thrb</sub><sup>2</sup></i>   | $1.0 \cdot \mu_{thrb}$ M <sup>2</sup>              |     | Variance of the cellular THRβ2 concentration         |
| <i>k<sub>D</sub><sup>thrb</sup></i>   | $1.51 \times 10^{-7}$ M                            | Y   | THRβ2-T3 equilibrium dissociation constant           |
| <i>k<sub>f</sub><sup>thrb</sup></i>   | $1 \times 10^6$ M <sup>-1</sup> s <sup>-1</sup>    |     | THRβ2-T3 kinetic on rate                             |
| <i>k<sub>r</sub><sup>thrb</sup></i>   | $k_D^{thrb} \cdot k_f^{thrb}$ s <sup>-1</sup>      |     | THRβ2-T3 kinetic off rate                            |
| <i>CME Model - fate determination</i> |                                                    |     |                                                      |
| <i>k<sub>f</sub><sup>fds</sup></i>    | $10$ s <sup>-1</sup>                               |     | Forward rate for FD(S) regulation                    |
| <i>k<sub>lo</sub><sup>fds</sup></i>   | $9.72 \times 10^{-4}$                              | Y   | Lower limit for FD(S) regulation                     |
| <i>k<sub>hi</sub><sup>fds</sup></i>   | $2.41 \times 10^{-1}$                              | Y   | Upper limit for FD(S) regulation                     |
| <i>k<sub>m</sub><sup>fds</sup></i>    | $4.37 \times 10^2$ molecules                       | Y   | Midpoint of THRβ2* for FD(S) regulation              |
| <i>h<sub>1</sub><sup>fds</sup></i>    | $3.61 \times 10^0$                                 | Y   | Hill exponent for FD(S) regulation                   |
| <i>k<sub>r</sub><sup>fds</sup></i>    | $100$ s <sup>-1</sup>                              |     | Reverse rate for FD(S) regulation                    |
| <i>k<sub>f</sub><sup>fdc</sup></i>    | $10$ s <sup>-1</sup>                               |     | Forward rate for FD(C) regulation                    |
| <i>k<sub>r</sub><sup>fdc</sup></i>    | $100$ s <sup>-1</sup>                              |     | Reverse rate for FD(C) regulation                    |
| <i>CME Model - opsin expression</i>   |                                                    |     |                                                      |
| <i>k<sub>deg</sub><sup>s</sup></i>    | $0.01$ s <sup>-1</sup>                             |     | S-opsin degradation rate                             |
| <i>k<sub>deg</sub><sup>m</sup></i>    | $0.01$ s <sup>-1</sup>                             |     | M-opsin degradation rate                             |
| <i>k<sub>eq</sub><sup>ss</sup></i>    | $2 \times 10^{-10}$ M                              |     | FD(S) S-opsin equilibrium concentration              |
| <i>k<sub>f</sub><sup>ss</sup></i>     | $k_{eq}^{ss} \cdot k_{deg}^s$ M s <sup>-1</sup>    |     | FD(S) S-opsin expression rate                        |
| <i>k<sub>eq</sub><sup>cs</sup></i>    | $2 \times 10^{-10}$ M                              |     | FD(C) S-opsin equilibrium concentration              |
| <i>k<sub>f</sub><sup>cs</sup></i>     | $k_{eq}^{cs} \cdot k_{deg}^s$ M s <sup>-1</sup>    |     | Forward rate for FD(C) S-opsin expression            |
| <i>k<sub>lo1</sub><sup>cs</sup></i>   | $3.05 \times 10^{-4}$                              | Y   | Lower limit for FD(C) S-opsin expression             |
| <i>k<sub>hi1</sub><sup>cs</sup></i>   | $6.44 \times 10^{-1}$                              | Y   | Upper limit for FD(C) S-opsin expression             |
| <i>k<sub>m1</sub><sup>cs</sup></i>    | $6.87 \times 10^2$ molecules                       | Y   | Midpoint of THRβ2* for S-opsin expression            |
| <i>h<sub>1</sub><sup>cs</sup></i>     | $1.40 \times 10^1$                                 | Y   | Hill exponent for FD(C) S-opsin expression           |
| <i>k<sub>lo2</sub><sup>cs</sup></i>   | $1.09 \times 10^{-3}$                              | Y   | Lower limit for FD(C) S-opsin expression             |
| <i>k<sub>hi2</sub><sup>cs</sup></i>   | $7.45 \times 10^{-1}$                              | Y   | Upper limit for FD(C) S-opsin expression             |
| <i>k<sub>m2</sub><sup>cs</sup></i>    | $2.66 \times 10^3$ molecules                       | Y   | Midpoint of THRβ2 for FD(C) S-opsin expression       |
| <i>h<sub>2</sub><sup>cs</sup></i>     | $1.39 \times 10^1$                                 | Y   | Hill exponent for FD(C) S-opsin expression           |
| <i>k<sub>eq</sub><sup>cm</sup></i>    | $2 \times 10^{-10}$ M                              |     | FD(C) M-opsin equilibrium concentration              |
| <i>k<sub>f</sub><sup>cm</sup></i>     | $k_{eq}^{cm} \cdot k_{deg}^m$ M s <sup>-1</sup>    |     | Forward rate for FD(C) M-opsin expression            |
| <i>k<sub>lo</sub><sup>cm</sup></i>    | $2.34 \times 10^{-14}$                             | Y   | Lower limit for FD(C) M-opsin expression             |
| <i>k<sub>hi</sub><sup>cm</sup></i>    | $1.26 \times 10^0$                                 | Y   | Upper limit for FD(C) M-opsin expression             |
| <i>k<sub>m</sub><sup>cm</sup></i>     | $6.17 \times 10^2$ molecules                       | Y   | Midpoint of THRβ2* for FD(C) M-opsin expression      |
| <i>h<sub>cm</sub></i>                 | $6.60 \times 10^{-1}$                              | Y   | Hill exponent for FD(C) M-opsin expression           |
