# Supplementary material for: Modeling binary and graded cone cell fate patterning in the mouse retina
Source: PubMed Central journal article supplement (PMC7082072; doi:10.1371/journal.pcbi.1007691), 2020-03-09

# S-opsin-only Expressing

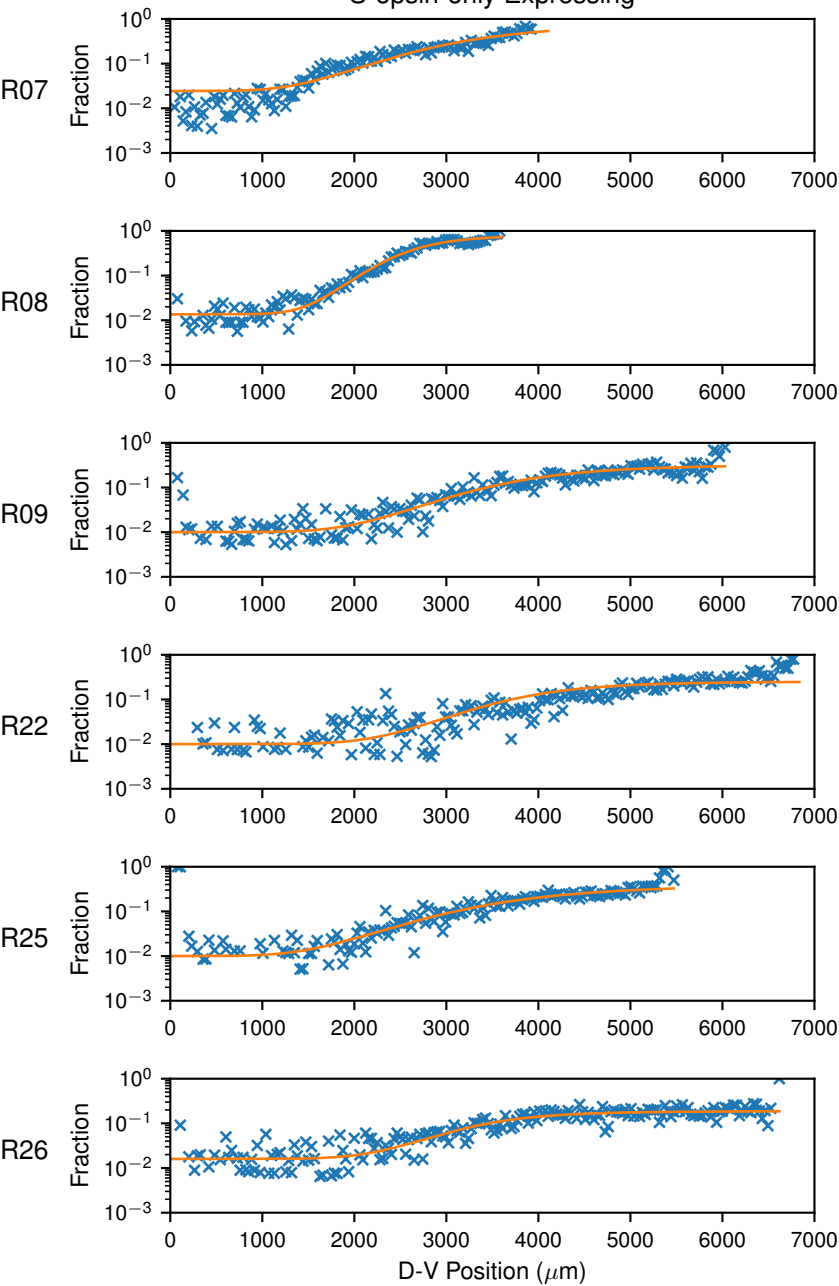

Supplement: pcbi.1007691.s008.pdf [file pcbi.1007691.s008.pdf]
